# Supplementary material
Source: publisher figshare collection journal article supplement (https://sage.figshare.com/articles/dataset/_/7745588)
Supplement: Supplementary file 1 [file 14413196]

### **Lagged Effects**

As mentioned in the Discussion, there was no evidence that exchange orientation moderated any next-day effects of conflict on intimacy. We report the detailed results of the lagged models below. We theorize that close monitoring of relationship costs and benefits has fast effects, and so the moderation effect is relatively immediate. Other individual differences that moderate conflict's effects may have a different time course, for example if they result from rumination; this is an interesting area for future research.

**Table S9.** Fixed and random effects for the next evening's intimacy model.

| Fixed Effects (intercept, slopes)               | Estimate | SE   | <i>t</i> ( <i>df</i> ) | <i>p</i> | 95% CI |        |
|-------------------------------------------------|----------|------|------------------------|----------|--------|--------|
|                                                 |          |      |                        |          | Lower  | Upper  |
| Intercept                                       | 4.87     | 0.10 | 50.44 (76)             | <.001    | 4.68   | 5.07   |
| Time                                            | 0.12     | 0.03 | 4.40 (801)             | <.001    | 0.06   | 0.17   |
| Exchange Orientation                            | -0.08    | 0.07 | -1.16 (118)            | .250     | -0.22  | 0.06   |
| Partner Exchange Orientation                    | -0.04    | 0.07 | -0.55 (117)            | .585     | -0.17  | 0.10   |
| Communal Orientation                            | 0.19     | 0.07 | 2.54 (101)             | .013     | 0.04   | 0.34   |
| Partner Communal Orientation                    | 0.17     | 0.07 | 2.26 (101)             | .026     | 0.02   | 0.32   |
| Within-Person Level Conflict                    | 0.37     | 0.12 | 3.11 (51)              | .003     | 0.13   | 0.61   |
| Between-Person Level Conflict                   | 0.74     | 1.04 | 0.71 (76)              | .478     | -1.33  | 2.81   |
| Within Conflict * Exchange Orientation          | 0.002    | 0.10 | 0.21 (133)             | .983     | -0.19  | 0.19   |
| Within Conflict * Partner Exchange Orientation  | 0.03     | 0.10 | 0.29 (132)             | .771     | -0.16  | 0.22   |
| Within Conflict * Communal Orientation          | -0.20    | 0.10 | -2.00 (90)             | .049     | -0.40  | -0.001 |
| Within Conflict * Partner Communal Orientation  | -0.16    | 0.10 | -1.59 (89)             | .116     | -0.36  | 0.04   |
| Between Conflict * Exchange Orientation         | 0.23     | 0.71 | 0.32 (157)             | .750     | -1.18  | 1.63   |
| Between Conflict * Partner Exchange Orientation | 0.27     | 0.71 | 0.38 (157)             | .702     | -1.13  | 1.68   |
| Between Conflict * Communal Orientation         | -0.90    | 0.92 | -0.98 (100)            | .330     | -2.74  | 0.93   |
| Between Conflict * Partner Communal Orientation | -1.71    | 0.92 | -1.85 (100)            | .067     | -3.54  | 0.12   |
|                                                 |          |      |                        |          | 95% CI |        |
| Random Effects ([co-]variances)                 | Estimate | SE   | <i>Wald Z</i>          | <i>p</i> | Lower  | Upper  |
| Level 2 (between-person)                        |          |      |                        |          |        |        |
| Couple-level Intercept                          | 0.12     | 0.04 | 2.81                   | .005     | 0.06   | 0.24   |
| Couple-level Covariance                         | 0.55     | 0.11 | 4.84                   | <.001    | 0.33   | 0.78   |
| Conflict and Couple-level Intercept             | 0        | 0    | -                      | -        | -      | -      |
| Conflict and Couple-level Covariance            | 0.45     | 0.16 | 2.90                   | .004     | 0.15   | 0.76   |
| Level 1 (within-person)                         |          |      |                        |          |        |        |
| Residual                                        | 1.63     | 0.05 | 34.94                  | <.001    | 1.54   | 1.73   |
| Autocorrelation                                 | 0.33     | 0.02 | 17.97                  | <.001    | 0.29   | 0.36   |

Note: Degrees of freedom were estimated using the Satterthwaite method.

**Table S10.** Fixed and random effects for the next evening's intimacy model controlling for negative evening mood.

| Fixed Effects (intercept, slopes)               | Estimate | SE   | <i>t</i> ( <i>df</i> ) | <i>p</i> | 95% CI |       |
|-------------------------------------------------|----------|------|------------------------|----------|--------|-------|
|                                                 |          |      |                        |          | Lower  | Upper |
| Intercept                                       | 5.09     | 0.10 | 51.24 (80)             | <.001    | 4.90   | 5.29  |
| Time                                            | 0.10     | 0.03 | 3.75 (797)             | <.001    | 0.05   | 0.15  |
| Lagged Negative Evening Mood                    | -0.07    | 0.01 | -13.38 (3367)          | <.001    | -0.08  | -0.06 |
| Exchange Orientation                            | -0.05    | 0.07 | -0.67 (121)            | .505     | -0.19  | 0.09  |
| Partner Exchange Orientation                    | -0.01    | 0.07 | -0.19 (120)            | .849     | -0.15  | 0.13  |
| Communal Orientation                            | 0.19     | 0.08 | 2.43 (103)             | .017     | 0.03   | 0.34  |
| Partner Communal Orientation                    | 0.17     | 0.08 | 2.20 (103)             | .030     | 0.02   | 0.32  |
| Within-Person Level Conflict                    | 0.30     | 0.11 | 2.73 (51)              | .009     | 0.08   | 0.53  |
| Between-Person Level Conflict                   | 0.77     | 1.06 | 0.73 (76)              | .469     | -1.33  | 2.87  |
| Within Conflict * Exchange Orientation          | 0.05     | 0.09 | 0.54 (142)             | .590     | -0.13  | 0.23  |
| Within Conflict * Partner Exchange Orientation  | 0.05     | 0.09 | 0.57 (144)             | .572     | -0.13  | 0.23  |
| Within Conflict * Communal Orientation          | -0.14    | 0.09 | -1.52 (94)             | .131     | -0.33  | 0.04  |
| Within Conflict * Communal Exchange Orientation | -0.08    | 0.10 | -0.85 (103)            | .396     | -0.27  | 0.11  |
| Between Conflict * Exchange Orientation         | 0.13     | 0.73 | 0.17 (158)             | .863     | -1.32  | 1.57  |
| Between Conflict * Partner Exchange Orientation | 0.49     | 0.73 | 0.67 (158)             | .505     | -0.96  | 1.93  |
| Between Conflict * Communal Orientation         | -0.98    | 0.94 | -1.04 (102)            | .303     | -2.84  | 0.89  |
| Between Conflict * Partner Communal Orientation | -1.53    | 0.94 | -1.62 (101)            | .108     | -3.40  | 0.34  |
| Random Effects ([co-]variances)                 | Estimate | SE   | <i>Wald Z</i>          | <i>p</i> | 95% CI |       |
| Level 2 (between-person)                        |          |      |                        |          |        |       |
| Couple-level Intercept                          | 0.16     | 0.05 | 3.27                   | .001     | 0.09   | 0.28  |
| Couple-level Covariance                         | 0.56     | 0.12 | 4.73                   | <.001    | 0.33   | 0.79  |
| Conflict and Couple-level Intercept             | 0        | 0    | -                      | -        | -      | -     |
| Conflict and Couple-level Covariance            | 0.36     | 0.13 | 2.71                   | .007     | 0.10   | 0.62  |
| Level 1 (within-person)                         |          |      |                        |          |        |       |
| Residual                                        | 1.56     | 0.04 | 34.77                  | <.001    | 1.47   | 1.65  |
| Autocorrelation                                 | 0.33     | 0.02 | 18.13                  | <.001    | 0.30   | 0.37  |

Note: Degrees of freedom were estimated using the Satterthwaite method.

**Table S11.** Fixed and random effects for the next evening's negative evening mood model.

| Fixed Effects (intercept, slopes)               | Estimate | SE   | <i>t</i> ( <i>df</i> ) | <i>p</i> | 95% CI |       |
|-------------------------------------------------|----------|------|------------------------|----------|--------|-------|
|                                                 |          |      |                        |          | Lower  | Upper |
| Intercept                                       | 3.22     | 0.29 | 11.20 (76)             | <.001    | 2.65   | 3.80  |
| Time                                            | -0.28    | 0.08 | -3.44 (821)            | .001     | -0.44  | -0.12 |
| Exchange Orientation                            | 0.46     | 0.24 | 1.91 (149)             | .059     | -0.02  | 0.94  |
| Partner Exchange Orientation                    | 0.32     | 0.24 | 1.33 (149)             | .184     | -0.15  | 0.79  |
| Communal Orientation                            | -0.05    | 0.25 | -0.19 (133)            | .851     | -0.54  | 0.45  |
| Partner Communal Orientation                    | -0.06    | 0.25 | -0.25 (133)            | .801     | -0.56  | 0.43  |
| Within-Person Level Conflict                    | -0.64    | 0.29 | -2.22 (36)             | .033     | -1.23  | -0.06 |
| Between-Person Level Conflict                   | 0.36     | 3.10 | 0.12 (76)              | .908     | -5.81  | 6.53  |
| Within Conflict * Exchange Orientation          | 0.47     | 0.27 | 1.76 (161)             | .081     | -0.06  | 1.00  |
| Within Conflict * Partner Exchange Orientation  | -0.12    | 0.27 | -0.45 (164)            | .653     | -0.65  | 0.41  |
| Within Conflict * Communal Orientation          | 0.60     | 0.27 | 2.25 (97)              | .027     | 0.07   | 1.12  |
| Within Conflict * Partner Communal Orientation  | 0.44     | 0.28 | 1.59 (103)             | .114     | -0.11  | 0.99  |
| Between Conflict * Exchange Orientation         | -1.45    | 2.69 | -0.54 (156)            | .591     | -6.76  | 3.87  |
| Between Conflict * Partner Exchange Orientation | 3.30     | 2.69 | 1.23 (156)             | .222     | -2.01  | 8.60  |
| Between Conflict * Communal Orientation         | -0.83    | 3.03 | -0.27 (130)            | .785     | -6.83  | 5.17  |
| Between Conflict * Partner Communal Orientation | 2.92     | 3.03 | 0.96 (130)             | .338     | -3.08  | 8.91  |
| Random Effects ([co-]variances)                 | Estimate | SE   | <i>Wald Z</i>          | <i>p</i> | 95% CI |       |
| Level 2 (between-person)                        |          |      |                        |          |        |       |
| Couple-level Intercept                          | 4.94     | 1.02 | 4.84                   | <.001    | 3.30   | 7.41  |
| Couple-level Covariance                         | 2.94     | 1.12 | 2.62                   | .009     | 0.74   | 5.14  |
| Conflict and Couple-level Intercept             | 0        | 0    | -                      | -        | -      | -     |
| Conflict and Couple-level Covariance            | 1.19     | 0.97 | 1.22                   | .222     | -0.72  | 3.10  |
| Level 1 (within-person)                         |          |      |                        |          |        |       |
| Residual                                        | 16.64    | 0.46 | 36.41                  | <.001    | 15.77  | 17.56 |
| Autocorrelation                                 | 0.28     | 0.02 | 14.54                  | <.001    | 0.24   | 0.32  |

Note: Degrees of freedom were estimated using the Satterthwaite method.
